# Supplementary material
Source: PubMed Central journal article supplement (PMC4181578)
Supplement: NIHMS568555-supplement-Supplemental_Info.pdf [file NIHMS568555-supplement-Supplemental_Info.pdf]

Supplementary Information S1 | p63 in human cancer

| Tumour                               | p63 mutation | Expression |     | Specimen                                                | p53 mutation | Refs |
|--------------------------------------|--------------|------------|-----|---------------------------------------------------------|--------------|------|
|                                      |              | RNA        | IHC |                                                         |              |      |
| <b>p63</b>                           |              |            |     |                                                         |              |      |
| SCC-lung                             | Ala148Pro    | ND         | ++  | Human tumors                                            | Not mutated  | 1    |
| HNSCC                                | Ser145Leu    | ND         | ++  | Human cell lines                                        | Not mutated  | 1    |
| Cervical carcinoma                   | Gln165Leu    | ND         | ++  | Human cell lines                                        | Not mutated  | 1    |
| Bladder carcinoma                    | ND           | ND         | ++  | Human tumors (n=160)                                    | ND           | 2    |
| Metastatic breast adenocarcinoma     | ND           | ND         | +   | Matched human primary and metastatic tumor pairs (n=18) | ND           | 3    |
| Lung adenocarcinoma                  | ND           | ND         | -   | Human tumors (n=200)                                    | ND           | 4    |
| SCC                                  | ND           | ND         | +   | Human tumors (n=225)                                    | ND           | 4    |
| Actinic cheilitis                    | ND           | ND         | ++  | Human tumors (n=40)                                     | ND           | 5    |
| Lip SCC                              | ND           | ND         | ++  | Human tumors (n=65)                                     | ND           | 5    |
| Urothelial carcinoma                 | ND           | ND         | ++  | Human tumors (n=50)                                     | ND           | 6    |
| Prostate adenocarcinoma              | ND           | ND         | -   | Human tumors (n=50)                                     | ND           | 6    |
| Oesophageal SCC                      | ND           | ND         | ++  | Human tumors (n=65)                                     | ND           | 7    |
| Thymoma                              | ND           | ND         | ++  | Human tumors (n=583)                                    | ND           | 8    |
| B-cell lymphoma                      | ND           | ND         | ++  | Human tumors (n=583)                                    | ND           | 8    |
| Squamous and transitional carcinoma  | ND           | ND         | -   | Human tumors (n=583)                                    | ND           | 8    |
| Endometroid tumor                    | ND           | ND         | ++  | Human tumors (n=583)                                    | ND           | 8    |
| Dysplastic urothelium                | ND           | ND         | +   | Human tumors (n=30)                                     | ND           | 9    |
| Urothelial carcinoma of the bladder  | ND           | ND         | -   | Human tumors (n=30)                                     | ND           | 9    |
| Prostate cancer (neoplastic lesions) | ND           | ND         | +   | Human tumors (n=90)                                     | ND           | 10   |
| Breast (invasive ductal carcinoma)   | ND           | ND         | -   | Human tumors (n=100)                                    | ND           | 11   |
| Transitional bladder carcinoma       | ND           | ND         | ++  | Human tumors (n=158)                                    | ND           | 12   |

|                                                    |                         |    |                     |                       |                        |    |
|----------------------------------------------------|-------------------------|----|---------------------|-----------------------|------------------------|----|
| Invasive bladder carcinoma                         | ND                      | ND | -                   | Human tumors (n=158)  | ND                     | 12 |
| Lung SCC                                           | ND                      | ND | ++                  | Human tumors (n= 81)  | ND                     | 13 |
| Lung adenocarcinoma                                | ND                      | ND | -                   | Human tumors (n= 237) | ND                     | 13 |
| ER <sup>+</sup> breast adenocarcinoma (low grade)  | ND                      | +  | ++                  | Human tumors (n=2158) | ND                     | 14 |
| ER <sup>+</sup> breast adenocarcinoma (high grade) | ND                      | -  | -                   | Human tumors (n=2158) | ND                     | 14 |
| Prostate adenocarcinoma                            | ND                      | ND | ++<br>(cytoplasmic) | Human tumors (n=298)  | ND                     | 15 |
| Small cell carcinoma                               | ND                      | ND | +                   | Human tumors (n=30)   | ND                     | 16 |
| Urothelial carcinoma of the bladder (high grade)   | ND                      | ND | +                   | Human tumors (n=30)   | ND                     | 16 |
| Associated with B-cell leukemia                    | Yes in exon 4 Ala111Thr | ND | +                   | Human (n=1)           | ND                     | 17 |
| <b>p63<math>\alpha</math></b> (TA and $\Delta$ N)  |                         |    |                     |                       |                        |    |
| Non-invasive bladder carcinoma                     | ND                      | ND | +                   | Human tumors (n=202)  | Mutation not specified | 18 |
| Invasive bladder carcinoma                         | ND                      | ND | -                   | Human tumors (n=202)  | Mutation not specified | 18 |
| <b><math>\Delta</math>Np63</b>                     |                         |    |                     |                       |                        |    |
| Non-invasive bladder carcinoma                     | ND                      | ND | -                   | Human tumors (n=202)  | Mutation not specified | 18 |
| Invasive bladder carcinoma                         | ND                      | ND | +                   | Human tumors (n=202)  | Mutation not specified | 18 |
| Nasopharyngeal carcinoma                           | Not mutated             | +  | ++                  | Human tumors (n=25)   | Not mutated            | 19 |
| Invasive bladder carcinoma                         | ND                      | ND | +                   | Human tumors (n=202)  | Mutation not specified | 20 |
| Bladder carcinoma (low grade)                      | ND                      | ND | -                   | Human tumors (n=49)   | ND                     | 21 |
| Bladder carcinoma (high grade)                     | ND                      | ND | ++                  | Human tumors (n=49)   | ND                     | 21 |
| Lung adenocarcinoma                                | ND                      | +  | +                   | Human tumors (n=92)   | ND                     | 22 |
| Lung adenocarcinoma                                | ND                      | ND | -                   | Human tumors (n=17)   | ND                     | 23 |

|                                     |             |    |    |                        |                                            |    |
|-------------------------------------|-------------|----|----|------------------------|--------------------------------------------|----|
| Lung SCC                            | ND          | ND | +  | Human tumors (n=17)    | ND                                         | 23 |
| HNSCC                               | ND          | ++ | ++ | Human cell lines (n=2) | ND                                         | 24 |
| HNSCC                               | ND          | ++ | ND | Human tumors (n=36)    | ND                                         | 25 |
| HNSCC                               | ND          | ND | ++ | Human tumors (n=24)    | ND                                         | 26 |
| Non-Hodgkin's lymphoma              | ND          | ND | ++ | Human tumors (n=11)    | ND                                         | 26 |
| NSCLC                               | ND          | ++ | ++ | Human tumors (n=46)    | ND                                         | 27 |
| Bladder carcinoma                   | Not mutated | ND | -  | Human tumors (n=47)    | Mutated (34.8%)<br>Mutation not specified. | 28 |
| <b>TAp63</b>                        |             |    |    |                        |                                            |    |
| Mammary adenocarcinoma (low grade)  | ND          | ND | +  | Human tumors (n=43)    | ND                                         | 29 |
| Mammary adenocarcinoma (high grade) | ND          | ND | -  | Human tumors (n=43)    | ND                                         | 29 |
| HNSCC (low grade)                   | ND          | +  | +  | Human tumors (n=46)    | ND                                         | 29 |
| HNSCC (metastatic)                  | ND          | -  | -  | Human tumors (n=46)    | ND                                         | 29 |
| Lung adenocarcinoma (low grade)     | ND          | +  | ND | Patient (n=92)         | ND                                         | 29 |
| Lung adenocarcinoma (high grade)    | ND          | -  | ND | Patient (n=92)         | ND                                         | 29 |
| HNSCC                               | ND          | ND | +  | Human tumors (n=24)    | ND                                         | 26 |
| Colon carcinoma                     | ND          | ND | +  | Human tumors (n=6)     | ND                                         | 26 |
| NSCLC                               | ND          | -  | -  | Human tumors (n=46)    | ND                                         | 27 |
| Bladder carcinoma                   | Not mutated | ND | -  | Human tumors (n=47)    | Mutated (34.8%)<br>Mutation not specified. | 28 |

ER, oestrogen receptor; HNSCC, head and neck squamous cell carcinoma; IHC, immunohistochemistry; ND, not determined; NSCLC, non-small-cell lung cancer; SCC, squamous cell carcinoma.

- undetectable expression
- + expression detected
- ++ high expression detected

**References:**

1. Osada, M. et al. Cloning and functional analysis of human p51, which structurally and functionally resembles p53. *Nat Med* **4**, 839-43 (1998).
2. Urist, M.J. et al. Loss of p63 expression is associated with tumor progression in bladder cancer. *Am J Pathol* **161**, 1199-206 (2002).
3. Shao, M.M. et al. A subset of breast cancer predisposes to brain metastasis. *Med Mol Morphol* **44**, 15-20.
4. Terry, J. et al. Optimal immunohistochemical markers for distinguishing lung adenocarcinomas from squamous cell carcinomas in small tumor samples. *Am J Surg Pathol* **34**, 1805-11.
5. Xavier, F.C., Takiya, C.M., Reis, S.R. & Ramalho, L.M. p63 Immunoexpression in lip carcinogenesis. *J Mol Histol* **40**, 131-7 (2009).
6. Din, N.U., Qureshi, A. & Mansoor, S. Utility of p63 immunohistochemical stain in differentiating urothelial carcinomas from adenocarcinomas of prostate. *Indian Journal of Pathology and Microbiology* **54**, 59-62 (2011).
7. Hara, T. et al. Ubiquitous p63 expression in human esophageal squamous cell carcinoma. *Int J Mol Med* **14**, 169-73 (2004).
8. Di Como, C.J. et al. p63 expression profiles in human normal and tumor tissues. *Clin Cancer Res* **8**, 494-501 (2002).
9. Stepan, A., Margaritescu, C., Simionescu, C. & Ciurea, R. E-cadherin and p63 immunoexpression in dysplastic lesions and urothelial carcinomas of the bladder. *Rom J Morphol Embryol* **50**, 461-5 (2009).
10. Hull, D. et al. Precursor of prostate-specific antigen expression in prostatic intraepithelial neoplasia and adenocarcinoma: a study of 90 cases. *BJU Int* **104**, 915-8 (2009).
11. Ribeiro-Silva, A. et al. p63 correlates with both BRCA1 and cytokeratin 5 in invasive breast carcinomas: further evidence for the pathogenesis of the basal phenotype of breast cancer. *Histopathology* **47**, 458-66 (2005).
12. Comperat, E. et al. Immunohistochemical expression of p63, p53 and MIB-1 in urinary bladder carcinoma. A tissue microarray study of 158 cases. *Virchows Arch* **448**, 319-24 (2006).
13. Bishop, J.A. et al. HPV Analysis in Distinguishing Second Primary Tumors From Lung Metastases in Patients With Head and Neck Squamous Cell Carcinoma. *Am J Surg Pathol* **36**, 142-8.
14. Hanker, L. et al. Clinical relevance of the putative stem cell marker p63 in breast cancer. *Breast Cancer Res Treat* **122**, 765-75.
15. Dhillon, P.K. et al. Aberrant cytoplasmic expression of p63 and prostate cancer mortality. *Cancer Epidemiol Biomarkers Prev* **18**, 595-600 (2009).
16. Buza, N., Cohen, P.J., Pei, H. & Parkash, V. Inverse p16 and p63 expression in small cell carcinoma and high-grade urothelial cell carcinoma of the urinary bladder. *Int J Surg Pathol* **18**, 94-102.
17. Cabanillas, M. et al. A Novel Heterozygous Point Mutation in the p63 Gene in a Patient with Ectodermal Dysplasia Associated with B-Cell Leukemia. *Pediatr Dermatol* **28**, 707-10.
18. Karni-Schmidt, O. et al. Distinct expression profiles of p63 variants during urothelial development and bladder cancer progression. *Am J Pathol* **178**, 1350-60.
19. Crook, T., Nicholls, J.M., Brooks, L., O'Nions, J. & Allday, M.J. High level expression of deltaN-p63: a mechanism for the inactivation of p53 in undifferentiated nasopharyngeal carcinoma (NPC)? *Oncogene* **19**, 3439-44 (2000).
20. Castillo-Martin, M., Domingo-Domenech, J., Karni-Schmidt, O., Matos, T. & Cordon-Cardo, C. Molecular pathways of urothelial development and bladder tumorigenesis. *Urol Oncol* **28**, 401-8.
21. Comperat, E. et al. p63 gene expression study and early bladder carcinogenesis. *Urology* **70**, 459-62 (2007).
22. Narahashi, T. et al. Cytoplasmic localization of p63 is associated with poor patient survival in lung adenocarcinoma. *Histopathology* **49**, 349-57 (2006).

23. Uramoto, H., Yamada, S. & Hanagiri, T. Immunohistochemical staining with deltaNp63 is useful for distinguishing the squamous cell component of adenosquamous cell carcinoma of the lung. *Anticancer Res* **30**, 4717-20.
24. Rocco, J.W., Leong, C.O., Kuperwasser, N., DeYoung, M.P. & Ellisen, L.W. p63 mediates survival in squamous cell carcinoma by suppression of p73-dependent apoptosis. *Cancer Cell* **9**, 45-56 (2006).
25. Sniezek, J.C., Matheny, K.E., Westfall, M.D. & Pietenpol, J.A. Dominant negative p63 isoform expression in head and neck squamous cell carcinoma. *Laryngoscope* **114**, 2063-72 (2004).
26. Nylander, K. et al. Differential expression of p63 isoforms in normal tissues and neoplastic cells. *J Pathol* **198**, 417-27 (2002).
27. Iacono, M.L. et al. p63 and p73 isoform expression in non-small cell lung cancer and corresponding morphological normal lung tissue. *J Thorac Oncol* **6**, 473-81.
28. Park, B.J. et al. Frequent alteration of p63 expression in human primary bladder carcinomas. *Cancer Res* **60**, 3370-4 (2000).
29. Su, X. et al. TAp63 suppresses metastasis through coordinate regulation of Dicer and miRNAs. *Nature* **467**, 986-90.
